# Supplementary material
Source: Springer Nature journal article supplement (https://www.springermedizin.de/resource/supplementary/40164_2012_25_MOESM2_ESM.pdf/9687028)

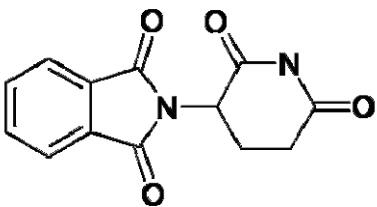

**Thalidomide**

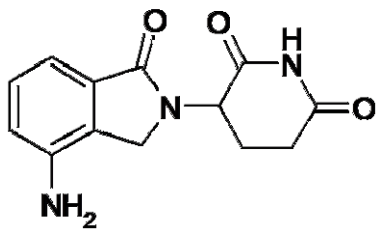

**Lenalidomide**

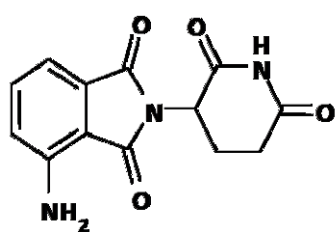

**Pomalidomide**

Supplement: MOESM2 [file 9687028]
